# Characteristic analysis of TCR $\beta$ -chain CDR3 repertoire for pre- and post-liver transplantation

This article has been corrected. Correction in [Oncotarget. 2020; 11:1679-1679](#).

Guiqi Yang<sup>1,\*</sup>, Minglin Ou<sup>1,2,\*</sup>, Huaizhou Chen<sup>1</sup>, Changchun Guo<sup>3</sup>, Jiejing Chen<sup>1</sup>, Hua Lin<sup>1</sup>, Donge Tang<sup>2</sup>, Wen Xue<sup>1</sup>, Wenlong Li<sup>4</sup>, Weiguo Sui<sup>1</sup> and Yong Dai<sup>2</sup>

<sup>1</sup>Guangxi Key Laboratory of Metabolic Diseases Research, Guilin 541002, P.R. China

<sup>2</sup>Clinical Medical Research Center, The Second Clinical Medical College of Jinan University, Shenzhen, Guangdong 518020, P.R. China

<sup>3</sup>The Pingshan People's Hospital of Shenzhen, Shenzhen, Guangdong 518118, P.R. China

<sup>4</sup>The Technology Company of iCarbonX, Shenzhen, Guangdong 518000, P.R. China

\*These authors contributed equally to this work

Correspondence to: Weiguo Sui, email: [suiwg@163.com](mailto:suiwg@163.com)

Yong Dai, email: [daiyong22@aliyun.com](mailto:daiyong22@aliyun.com)

**Keywords:** T cell receptor; immune repertoire; next-generation sequencing; liver transplantation

**Received:** February 07, 2018

**Accepted:** September 10, 2018

**Published:** October 02, 2018

**Copyright:** Yang et al. This is an open-access article distributed under the terms of the Creative Commons Attribution License 3.0 (CC BY 3.0), which permits unrestricted use, distribution, and reproduction in any medium, provided the original author and source are credited.

## ABSTRACT

**Liver cirrhosis of hepatitis B is an immune-related disease in which liver cells die during the body's immune system activation to clear the virus, and the progress is closely related to T lymphocytes. T lymphocyte cells recognise antigens, specifically by major histocompatibility complex (MHC), through a membrane protein T cell receptor (TCR). Here, we used high throughput immune repertoire sequencing technique to study the characteristics and diversity of the TCR repertoire between patients who underwent liver transplantation and healthy controls (NC). We sequenced the TCR  $\beta$ -chain complementary-determining region 3 (CDR3) repertoire in peripheral blood mononuclear cells (PBMCs) from 6 liver transplantation patients before transplantation (Pre) and on the first (Post1) and seventh days (Post7) after transplantation along with 6 NC. We observed that the distributions of CDR3, VD indel, and DJ indel lengths were similar among the Pre, Post1, Post7 and NC groups. We found that the TCR repertoire diversity of transplantation groups was relatively lower compared to NC group. The Pre-group had more highly expanded T cell clones compared to Post1, Post7 and NC groups, and the diversity of the T cell repertoire of the Post7 group was significantly decreased compared to the Pre, Post1 and NC groups. In addition, we found our results also show that various TRBV expression increased and some public sequences at different time points after liver transplantation, and the expression levels of 3 TRBV segments and 2 TRBJ segments were also significantly different in Pre, Post1, Post7 and NC groups. Moreover, 1 aa sequence shared by all liver transplantation patients and 2 aa sequences shared by at least two groups, which may serve as biomarkers to monitor the immune status of liver transplant patients.**

## INTRODUCTION

Chronic hepatitis B virus (HBV) infection leads to a range of liver diseases with a series of symptoms. From chronic hepatitis, complications of liver cirrhosis to hepatocellular carcinoma (HCC) are observed, which it is

a major global public health problem [1]. HBV infection causes 500,000 to 1.2 million deaths every year, 320,000 of which are due to HCC [2]. The prognosis for patients with decompensated HBV cirrhosis is poor, with a 5-year survival of only 14% compared with 84% in patients with compensated HBV cirrhosis [3].

The ultimate cure for end-stage liver disease is liver transplantation, but many patients with advanced hepatitis B worldwide do not have access to or are not eligible for this treatment modality [4–5]. Liver function disorder of decompensated hepatitis B cirrhosis results in a series of body disorders, in turn affecting the body's immune system and breaking up the diversity of the immune cells, eventually leading to the imbalance of the immune system. T lymphocytes are the key mediators of adaptive immunity, the invasion of pathogens, rejection and immune tolerance after organ transplantation. There are no accurate indicators of immune function after liver transplantation. Therefore, establishing the immune repertoire of decompensated hepatitis B cirrhosis patients during the perioperative period in liver transplantation is very urgent and important, as it may guide the rational application of individualised immunosuppressive drugs. This will further elucidate the aetiology and pathogenesis of decompensated hepatitis B cirrhosis, deepen the understanding of the disease aetiology, and provide a new opportunity for disease prevention, diagnosis and treatment. The immune repertoire (IR) refers to all functional B cells and T cells in the circulatory system at any time point [6]. T lymphocyte cells recognise antigens specifically by MHC through a membrane protein T cell receptor (TCR), which plays an important role in protection against graft-versus-leukaemia, opportunistic infections and other clinical challenges during early organ transplantation [7–8]. In general, T cells develop in the thymus from progenitors originating from haematopoietic stem cells in the bone marrow, and every T cell encodes a unique TCR. TCRs are heterodimeric, and approximately 90%–95% consist of an  $\alpha$  chain and  $\beta$  chain, and approximately 5%–10% consist of a  $\gamma$  chain and  $\delta$  chain. Each chain can be divided into variable regions (V region), cytoplasmic domains, consistent regions (C region) and transmembrane domains. The V region of the  $\alpha$  chain and  $\beta$  chain has three hypervariable regions called complementary- determining regions (CDRs): CDR1, CDR2 and CDR3, among which CDR3 is the most variable and directly determines the antigen-binding specificity of TCRs. In the maturity process of lymphocytes, CDR3 undergoes genomic rearrangement among the Variable (V), Diversity (D) and Joining (J) gene segments, plus the addition/subtraction of non-templated bases at recombinant junctions. These events finally contribute to the diversity of T cells, and different T cell clones have different CDR3 sequences [9–10]. A study predicted that the number of diverse TCR  $\alpha\beta$  pairs has been found up to  $2.5 \times 10^{17}$ , which makes the T cell repertoire difficult to analyze [11]. The traditional techniques (such as flow cytometry and immune scanning spectrum analysis technique) cannot analyze the overall repertoire [12]. The development of new generation sequencing technology, including next-generation sequencing (NGS) technologies, in which sequences are

decoded on arrays and millions of sequences can be read simultaneously [13], has been transformative for immune repertoire analysis.

Here, we evaluated the diversity of the immune system per patient with hepatitis B in decompensated liver cirrhosis before transplantation (Pre) and at two time points after liver transplantation (on the first (Post1) and seventh days (Post7) after transplantation) in a cohort of 6 patients compared to healthy controls (NC,  $n = 6$ ) by amplifying the CDRs of TCRs using multiplex-PCR, then exploring the association between the immune repertoire and disease by high-throughput sequencing. The large-scale sequencing of the immune receptor repertoire offers a distinct and highly detailed molecular characterisation that may reform our perception of the immune system. Moreover, this method allows for the identification of the receptors expressed by expanded clonal T cell populations, which may be associated with the immune pathogenesis of donor antigens, and provides the basis for further investigation into the mechanisms of rejection during the perioperative period in liver transplantation. Based on these studies, we can delineate the immune repertoire of liver transplant patients, which might help in the evaluation of the preoperative and postoperative immune system and help to induce tolerance selectively against transplantation antigens. Furthermore, this study can offer important new information for the classification and monitoring of liver transplant recipients.

## RESULTS

We sequenced TCR repertoires collected from the peripheral blood of six healthy individuals (NC) and six patients of hepatitis B with decompensated liver cirrhosis (including Pre ( $n = 6$ ), Post1 ( $n = 6$ ), Post7 ( $n = 6$ ) groups) by high-throughput sequencing (Illumina Genome Analyzer), obtaining an average of 18059673.79 total raw reads in each sample. Then, the raw reads were filtered, including adapter contamination, removal of low-quality reads and bases with low quality (lower than 10), and used miTCR, which was developed by MiLaboratory [14], to map the reads to a database. The TCR $\beta$  CDR3 sequences were identified. We collected an average of 15844686.04 reads per sample, which met the quality requirements after alignment. The total sequences, total input sequences, and unique CDR3 amino acid total clonotypes of each sample are shown in Table 1.

### Shared TCR clones among subjects

We assessed how commonly TCR sequences were shared among the different subjects of the same groups. We used high-throughput sequencing to characterise the corresponding portions of the respective TCR repertoires from the Pre-group, Post1 group, Post7 group and NC group. We further assessed how commonly TCR sequences were

**Table 1: TCR $\beta$  sequence statistics of all samples**

| sample  | Total reads (pair) | Filter rate (%) | All reads number | Total input sequences | Total good sequences | Clones | Out of frame clones (%) |
|---------|--------------------|-----------------|------------------|-----------------------|----------------------|--------|-------------------------|
| NC-1    | 14531938           | 7.58            | 13429915         | 12741793              | 6974774              | 65236  | 28.95                   |
| NC-2    | 15120523           | 5.60            | 14279961         | 13686795              | 9294862              | 76888  | 32.86                   |
| NC-3    | 11705732           | 2.27            | 11439695         | 10962971              | 9413701              | 89202  | 39.45                   |
| NC-4    | 20742618           | 3.41            | 20035882         | 19624585              | 16349931             | 75953  | 42.97                   |
| NC-5    | 21233023           | 4.22            | 20336693         | 19905248              | 12191501             | 93477  | 37.25                   |
| NC-6    | 23280243           | 3.11            | 22556798         | 2726023               | 2452132              | 75408  | 21.62                   |
| pre-1   | 14123714           | 16.67           | 11769844         | 11561054              | 9234279              | 55901  | 25.8                    |
| pre-2   | 14449375           | 4.58            | 13786945         | 13558505              | 10477547             | 96471  | 31.58                   |
| pre-3   | 17335420           | 16.57           | 14463087         | 14160116              | 11007669             | 36780  | 29.87                   |
| pre-4   | 14342880           | 9.38            | 12998104         | 12779055              | 2631309              | 9247   | 29.45                   |
| pre-5   | 16429473           | 14.52           | 14043757         | 13789324              | 3869428              | 8294   | 27.65                   |
| pre-6   | 22316233           | 6.00            | 20976527         | 20190190              | 17321956             | 70954  | 41.26                   |
| Post1-1 | 17567602           | 24.89           | 13194638         | 12819664              | 6888316              | 16438  | 27.0                    |
| Post1-2 | 14191447           | 14.87           | 12081718         | 11868324              | 5623017              | 18603  | 27.68                   |
| Post1-3 | 16328862           | 10.10           | 14679046         | 14489682              | 7864389              | 45344  | 24.72                   |
| Post1-4 | 14312776           | 15.10           | 12151499         | 11891015              | 9959463              | 47491  | 33.18                   |
| Post1-5 | 17246806           | 38.69           | 10574720         | 10094499              | 8585701              | 17373  | 21.63                   |
| Post1-6 | 23301649           | 8.53            | 21314090         | 20534392              | 11390657             | 27946  | 36.97                   |
| Post7-1 | 14771074           | 4.99            | 14034535         | 13885138              | 12628614             | 186033 | 31.48                   |
| Post7-2 | 14209864           | 5.34            | 13450561         | 13307342              | 11461755             | 62653  | 30.33                   |
| Post7-3 | 36614213           | 31.98           | 24906707         | 24331925              | 14800101             | 44186  | 25.21                   |
| Post7-4 | 15083842           | 6.45            | 14111126         | 13898803              | 11983390             | 120267 | 36.56                   |
| Post7-5 | 18531630           | 16.27           | 15517186         | 15254872              | 10407446             | 20085  | 36.21                   |
| Post7-6 | 25658834           | 5.92            | 24139431         | 23083948              | 15498797             | 46833  | 40.31                   |

shared between different individuals of the same group. Approximately  $4.68 \times 10^5$ ,  $3.12 \times 10^5$ ,  $5.45 \times 10^5$  and  $9.14 \times 10^5$  unique CDR3 nucleotide sequences were obtained for the TCR repertoires of the pre-group, post1 group, post7 group and NC group, respectively, which corresponded to approximately  $4.83 \times 10^5$ ,  $2.82 \times 10^5$ ,  $4.21 \times 10^5$  and  $8.02 \times 10^5$  unique TCR amino acid(aa) sequences, respectively. We combined all the data for each group for further analysis and then binned unique CDR3 DNA sequences and aa sequences based on the number of subjects in which they occurred. We found almost all the CDR3 DNA sequences and aa sequences were found in only one subject. A small number of sequences were shared among the individuals.

Another interesting finding in our study was that 30 amino acid sequences and 15 CDR3 DNA sequences were observed in one healthy individual and also observed in other healthy individuals, and 1 amino acid sequence was observed in all the patients (Pre-group, Post1 and Post7 group). For example, the amino acid sequence

CASSLGGSYEQYF was presented in all patients (Pre-group, Post1 and Post7 group), but not in control samples. Furthermore, we also found that 1 amino acid sequence was shared by the Post1 and Post7 groups and control samples. However, the amino acid sequence CASSLGETQYF was observed in Post1 and Post7 groups and all control samples. We next inquired into the possible public TCRs, which were shared in liver cirrhosis of hepatitis B pathogenesis. We analysed the CDR3 DNA and amino acid sequences of all the public in all the subjects, and a summary is shown in Supplementary Table 2. The function of the highly expanded clones (HECs) and amino acid sequences have not been verified. Identification of the liver cirrhosis-specific public TCR CDR3 DNA and amino acid sequences or the HECs of the control and diseases groups (Pre-group, Post1 and Post7group) may help us in understanding antigen selection and may also be critical for us to understand the immunoregulation of T cells for liver cirrhosis pathogenesis.

## Distribution characteristics of CDR3 length, VD indel length and DJ indel length references

We can obtain the information about the last position of the V gene on the sequence, the start position of the D gene, the last site of the D gene and the start site of the J gene after alignment and structural analysis. According to the loci information, to find the bases of indel V-D-J recombination, statistical analysis and plotting its length distribution is necessary. Moreover, the TCR CDR3 region of sequences was determined, and the CDR3 $\beta$  length distribution, VD indel length and DJ indel length are shown in Figure 1. As observed in Figure 1, CDR3 varied from 16 to 106 nt, with a peak at 42 in each group, and the 5 most frequently observed CDR3 lengths were 42, 45, 36, 39 and 48 nt. The VD indel length ranged from -1 to 73 nt, and the DJ indel length ranged from -1 to 68 nt. We found that the CDR3 length distribution, VD indel length and DJ indel length were similar in controls and patients with hepatitis B in decompensated liver cirrhosis (including Pre, Post1 and Post7 groups).

## Degree of expansion and impact of T cell clones

According to the identity of each sequence after alignment, we calculated the frequency of expression of each clone. Then, the degree of expansion of each individual clone was estimated, which was based on the unique CDR3 sequence frequency within a sample and divided into 5 groups ( $\geq 0.5\%$ ,  $0.05\sim 0.5\%$ ,  $0.005\sim 0.05\%$ ,  $0.0005\sim 0.005\%$ , and  $<0.0005\%$ , respectively). We defined that TCR clones with a frequency more than 0.5% of total reads in a sample were HECs. After statistical analyses, we found that only  $1.11 \times 10^{-2}$  (range,  $4.48 \times 10^{-3}$  to  $2.30 \times 10^{-2}$ ) of the clones were expanded beyond this threshold in the healthy control group. This corresponded to a median of 8.3 clones (range 4 to 15), in absolute numbers. In the Pre-group, there were 7.2 HECs (range, 1 to 16), with a proportion of  $4.99 \times 10^{-2}$  (range  $2.72 \times 10^{-3}$  to  $1.73 \times 10^{-1}$ ) in total clones. We also observed that  $3.35 \times 10^{-2}$  (range,  $4.41 \times 10^{-3}$  to  $7.95 \times 10^{-2}$ ) and  $3.86 \times 10^{-3}$  (range  $1.08 \times 10^{-3}$  to  $7.98 \times 10^{-3}$ ) of the clones were HECs in the Post1 and Post7 groups, and with absolute numbers, a median of 6.8 clones (median, 2 to 13) and 2.3 clones (median, 1 to 5) in the Post1 and Post7 group (Table 2 and Figure 2). Comparison of the degree of expansion of the most expanded clones in each group revealed that the clones in the Post7 groups were significantly more than in other groups ( $P = 0.046$ ). We also found that a comparison of the degree of expansion of the most expanded the total good sequences in the Post7 group were significantly more expanded than in the NC group ( $P = 0.026$ ). Afterwards, we determined the contribution of HECs to the whole T cell TCR repertoire and found that most of the repertoires consisted of a small number of HECs. For the Pre-group, there were 43 HECs ( $4.99 \times 10^{-2}\%$  of all the unique CDR3 sequences) that accounted for 13.79% of the T

cell sequences (total good reads); however, 74.01% of the clones were very low-frequency clones ( $<0.0005\%$  of the total TCR sequences analysed), which accounted for only 1.42% of the T cell sequences that were present (total good reads).

As described above, there were 50 HECs ( $1.11 \times 10^{-2} \pm 6.68 \times 10^{-3}\%$  of the total clones) in the NC group, which was more than that of the Pre-group (43 HECs, accounted for  $4.99 \times 10^{-2} \pm 7.03 \times 10^{-2}\%$  of the total clones), in the Post1 group (41 HECs, accounted for  $3.35 \times 10^{-2} \pm 3.04 \times 10^{-2}\%$  of the total clones) and in the Post7 group (14 HECs,  $3.86 \times 10^{-3} \pm 2.5 \times 10^{-3}\%$  of the total clones). The number of HEC sequences in the Post7 group was the least among the groups. We have summarised these HECs in Supplementary Table 1. Then, we investigated whether the HEC sequences overlapped between the different groups and found that there were no HECs shared among the groups. The 10 most expanded clones were plotted to compare the differences in DNA sequences, amino acid levels, and V-J combinations in each group (Figure 3). From Figure 3, the findings did not provide strong evidence of similarities of HECs among the different subjects at the DNA sequence and amino acid levels. However, the ten most common V-J combinations were observed in all subjects (including normal individuals and the liver transplant recipients with hepatitis B cirrhosis of the liver decompensation); only the frequency distribution was inconsistent.

To quantify the overall diversity of TCR repertoires of the NC, Pre, Post1 and Post7 groups, we applied the normalised inverse Simpson's diversity index (1/Ds) to quantitatively measure the diversity performed on DNA sequences, amino acid sequences and V-J combinations. The inverse Simpson's index (1/Ds) ranges from 1 to  $\infty$ , in which 1 indicates no diversity and  $\infty$  indicates the most diversity and is the highest when all clonotypes are equally distributed. The index of the Post7 samples (1/Ds = 1.001 at the DNA level; 1.009 at the amino acid and V-J pair level) was obviously less than that of the Pre (1/Ds = 1.007 at the DNA level; 1.017 at the amino acid and V-J pair level), Post1 (1/Ds = 1.005 at the DNA level; 1.014 at the amino acid and V-J pair level) and NC samples (1/Ds = 1.023 at the DNA level; 1.031 at the amino acid and V-J pair level), and the NC group exhibited the highest TCR diversity (Figure 4). Therefore, our results showed that the T cell TCR repertoire of peripheral blood has much more skewed composition in the Post7 group than in the Post1, Pre- and NC groups, and the complexity of the TCR repertoire tended to decrease postoperatively.

## Comparison of TR $\beta$ V and TR $\beta$ J repertoires between groups

We compared the expression levels of the respective TRBV and TRBJ repertoires use frequencies of the Pre group, Post1 group, Post7 group and NC group to analyze whether there is disease specific difference. For the 47



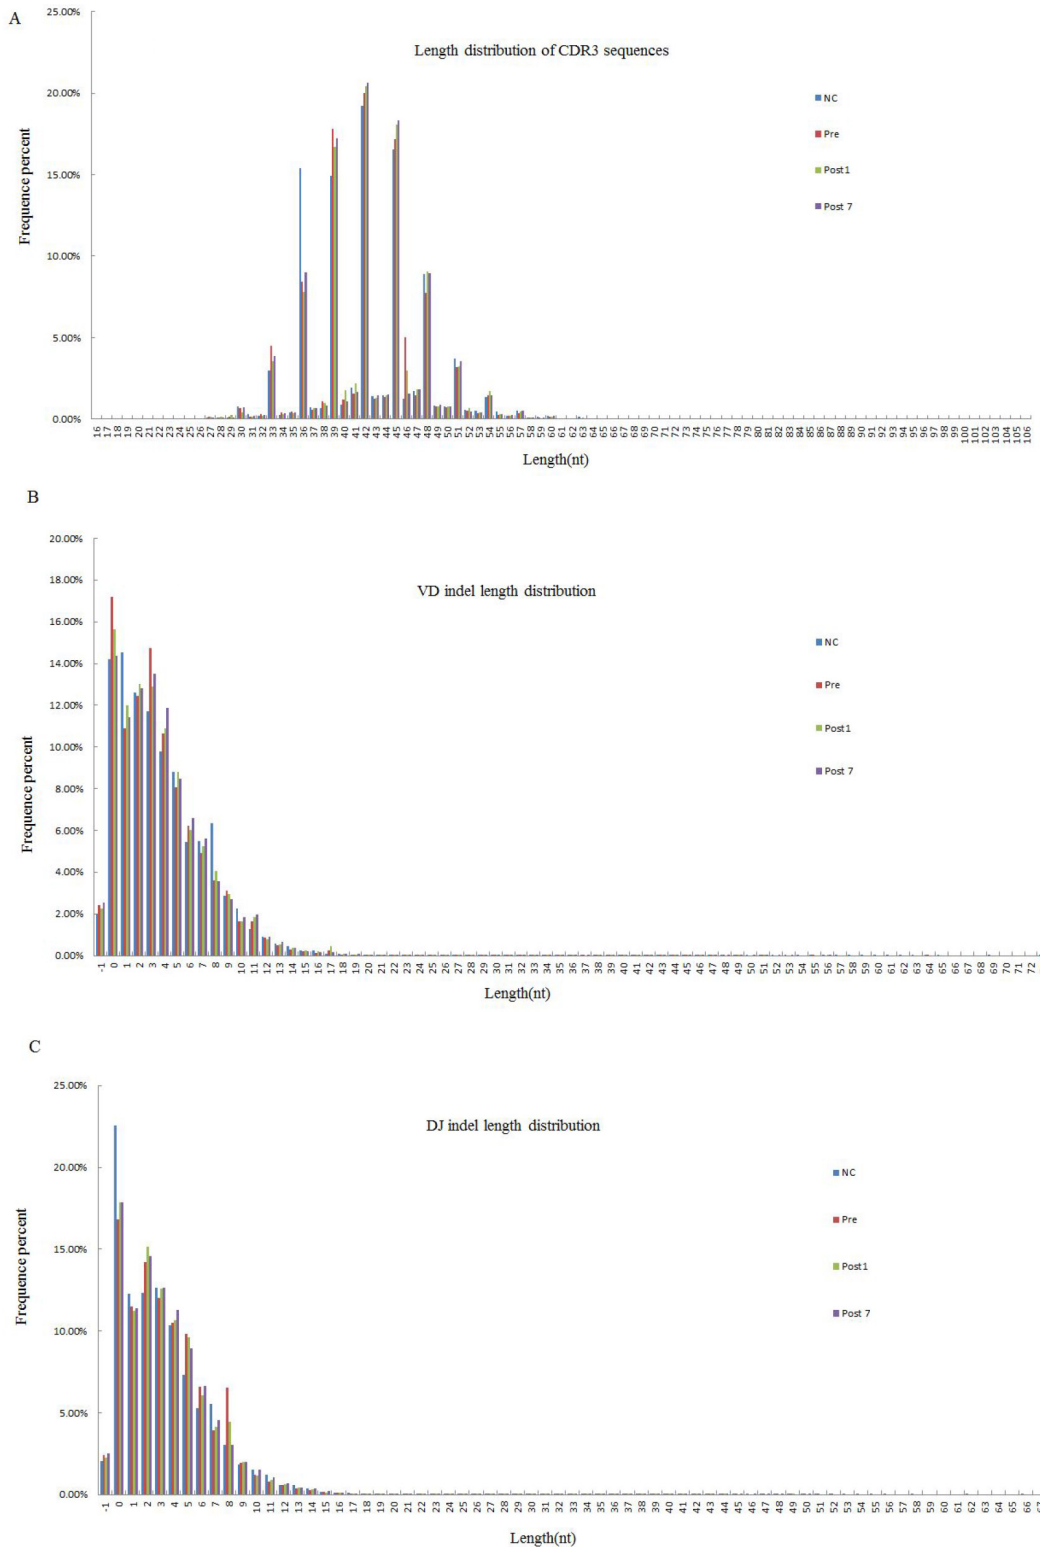

**Figure 1: The Length distribution of CDR3, VD indel, and DJ indel in the NC group ( $n = 6$ ), Pre group ( $n = 6$ ), Post1 group ( $n = 6$ ) and Post7 group ( $n = 6$ ) (average of six individuals).** The length distributions of CDR3 appear to be consistent in Pre, Post1, Post7 and NC group. (A) Of the 238,310,735 total good sequences for among the 4 groups, and the 5 most frequently observed CDR3 lengths were were 42, 45, 36, 39 and 48 nt. (B) The Total number of (inserted  $\pm$  deleted) nucleotides at  $V\beta$ - $D\beta$  junctions. The 5 most frequently observed VD indel lengths were 0, 2, 3, 1 and 4 nt. (C) Total number of (inserted  $\pm$  deleted) nucleotides at  $D\beta$ - $J\beta$  junctions. The 5 most common observed DJ indel lengths were the same as VD indel lengths, which also were 0, 2, 3, 1 and 4 nt.

**Table 2: Comparison of the clonotype abundance distribution in each group among unique TCRβ nucleotide clonotypes and across the total TCRβ nucleotide repertoires**

| Degree of expansion | Clones (%)                                    |                                               |          | Total good sequences |               |          |
|---------------------|-----------------------------------------------|-----------------------------------------------|----------|----------------------|---------------|----------|
|                     | Pre group                                     | NC group                                      | <i>P</i> | NC group             | Pre group     | <i>P</i> |
| ≥0.5%               | $4.99 \times 10^{-2} \pm 7.03 \times 10^{-2}$ | $1.11 \times 10^{-2} \pm 6.68 \times 10^{-3}$ | 0.251    | 22.59 ± 14.72        | 13.79 ± 10.41 | 0.293    |
| 0.05% ≡ <-0.5%      | $2.16 \pm 3.292 \times 10^{-2}$               | $7.55 \times 10^{-2} \pm 3.2$                 | 0.180    | 8.59 ± 2.60          | 23.79 ± 28.04 | 0.238    |
| 0.005 ≡ <-0.05      | 9.58 ± 3.81                                   | 3.20 ± 2.50                                   | 0.002    | 21.41 ± 17.03        | 43.03 ± 22.21 | 0.132    |
| 0.0005 ≡ <-0.005    | 14.21 ± 8.66                                  | 30.65 ± 9.86                                  | 0.007    | 44.29 ± 10.86        | 17.97 ± 15.96 | 0.014    |
| <0.0005%            | 74.01 ± 4.65                                  | 66.07 ± 8.11                                  | 0.066    | 3.11 ± 1.65          | 1.42 ± 1.31   | 0.098    |

  

| Degree of expansion | Clones (%)                                    |                                               |          | Total good sequences |                                               |          |
|---------------------|-----------------------------------------------|-----------------------------------------------|----------|----------------------|-----------------------------------------------|----------|
|                     | Pre group                                     | post1 group                                   | <i>P</i> | Pre group            | post1 group                                   | <i>P</i> |
| ≥0.5%               | $4.99 \times 10^{-2} \pm 7.03 \times 10^{-2}$ | $3.35 \times 10^{-2} \pm 3.04 \times 10^{-2}$ | 0.626    | 13.79 ± 10.41        | 11.09 ± 11.65                                 | 0.541    |
| 0.05% ≡ <-0.5%      | 2.16 ± 3.29                                   | 1.57 ± 1.33                                   | 0.676    | 23.79 ± 28.04        | 32.97 ± 29.17                                 | 0.365    |
| 0.005 ≡ <-0.05      | 9.58 ± 3.81                                   | 9.85 ± 4.44                                   | 0.911    | 43.03 ± 22.21        | 49.75 ± 27.91                                 | 0.360    |
| 0.0005 ≡ <-0.005    | 14.21 ± 8.66                                  | 6.36 ± 7.48                                   | 0.215    | 17.97 ± 15.96        | 5.45 ± 8.42                                   | 0.210    |
| <0.0005%            | 74.01 ± 4.65                                  | 82.19 ± 9.33                                  | 0.104    | 1.42 ± 1.31          | $7.45 \times 10^{-1} \pm 3.95 \times 10^{-1}$ | 0.318    |

  

| Degree of expansion | Clones (%)                                    |                                              |          | Total good sequences |               |          |
|---------------------|-----------------------------------------------|----------------------------------------------|----------|----------------------|---------------|----------|
|                     | Pre group                                     | post7 group                                  | <i>P</i> | Pre group            | post7 group   | <i>P</i> |
| ≥0.5%               | $4.99 \times 10^{-2} \pm 7.03 \times 10^{-2}$ | $3.86 \times 10^{-3} \pm 2.5 \times 10^{-3}$ | 0.172    | 13.79 ± 10.41        | 2.67 ± 1.80   | 0.049    |
| 0.05% ≡ <-0.5%      | 2.16 ± 3.29                                   | $8.85 \times 10^{-1} \pm 1.36$               | 0.290    | 23.79 ± 28.04        | 23.78 ± 28.25 | 0.999    |
| 0.005 ≡ <-0.05      | 9.58 ± 3.81                                   | 6.27 ± 5.17                                  | 0.345    | 43.03 ± 22.21        | 40.87 ± 26.02 | 0.879    |
| 0.0005 ≡ <-0.005    | 14.21 ± 8.66                                  | 14.43 ± 12.10                                | 0.967    | 17.97 ± 15.96        | 29.61 ± 31.69 | 0.438    |
| <0.0005%            | 74.01 ± 4.65                                  | 78.41 ± 9.98                                 | 0.358    | 1.42 ± 1.31          | 3.05 ± 3.74   | 0.309    |

  

| Degree of expansion | Clones (%)                                    |                                              |          | Total good sequences                          |               |          |
|---------------------|-----------------------------------------------|----------------------------------------------|----------|-----------------------------------------------|---------------|----------|
|                     | post1 group                                   | post7 group                                  | <i>P</i> | post1 group                                   | post7         | <i>P</i> |
| ≥0.5%               | $3.35 \times 10^{-2} \pm 3.04 \times 10^{-2}$ | $3.86 \times 10^{-3} \pm 2.5 \times 10^{-3}$ | 0.046    | 11.09 ± 11.65                                 | 2.67 ± 1.80   | 0.148    |
| 0.05% ≡ <-0.5%      | 1.57 ± 1.33                                   | $8.85 \times 10^{-1} \pm 1.36$               | 0.330    | 32.97 ± 29.17                                 | 23.78 ± 28.25 | 0.535    |
| 0.005 ≡ <-0.05      | 9.85 ± 4.44                                   | 6.27 ± 5.17                                  | 0.217    | 49.75 ± 27.91                                 | 40.87 ± 26.02 | 0.520    |
| 0.0005 ≡ <-0.005    | 6.36 ± 7.48                                   | 14.43 ± 12.10                                | 0.093    | 5.45 ± 8.42                                   | 29.61 ± 31.69 | 0.094    |
| <0.0005%            | 82.19 ± 9.33                                  | 78.41 ± 9.98                                 | 0.309    | $7.45 \times 10^{-1} \pm 3.95 \times 10^{-1}$ | 3.05 ± 3.74   | 0.186    |

TRBV gene segments, TRBV2, TRBV10-3 and TRBV20-1 were highly expressed in Pre, Post1 and Post7 group PBMCs while TRBV30 is significantly poorly expressed in Pre, Post1 and Post7 group PBMCs. For the 13 TRBJ genes segments, TRBJ1-2 showed significantly lower usage in the PBMCs of the Pre, Post1 and Post7 group, whereas TRBJ2-7 is highly expressed in Pre group than in other groups PBMCs (Figure 5). Then, we also compared the relative frequencies of V–J combinations among the four groups. For the TCR repertoires of all subjects ( $n = 24$ ), we were obtained 8159 annotated V–J pairs; among these, we found that the relative frequencies of 104 V–J pairs were significantly different in the Pre group compared to the NC group, 45 V–J pairs were significantly

different in the Post1 group compared to the Pre group and there were 32 V–J pairs were significantly different in the Post7 group compared to the Post1 group (Figure 6). Significant differences were considered at  $p < 0.05$  by the *t*-test.

## DISCUSSION

Liver transplantation is a well-established modality for treating patients with end-stage hepatitis B cirrhosis for which there are no alternative treatments [15]. The diversity of the immune repertoire is the foundation of the immune response, in which the T cells play an important role. The decreased diversity of the immune

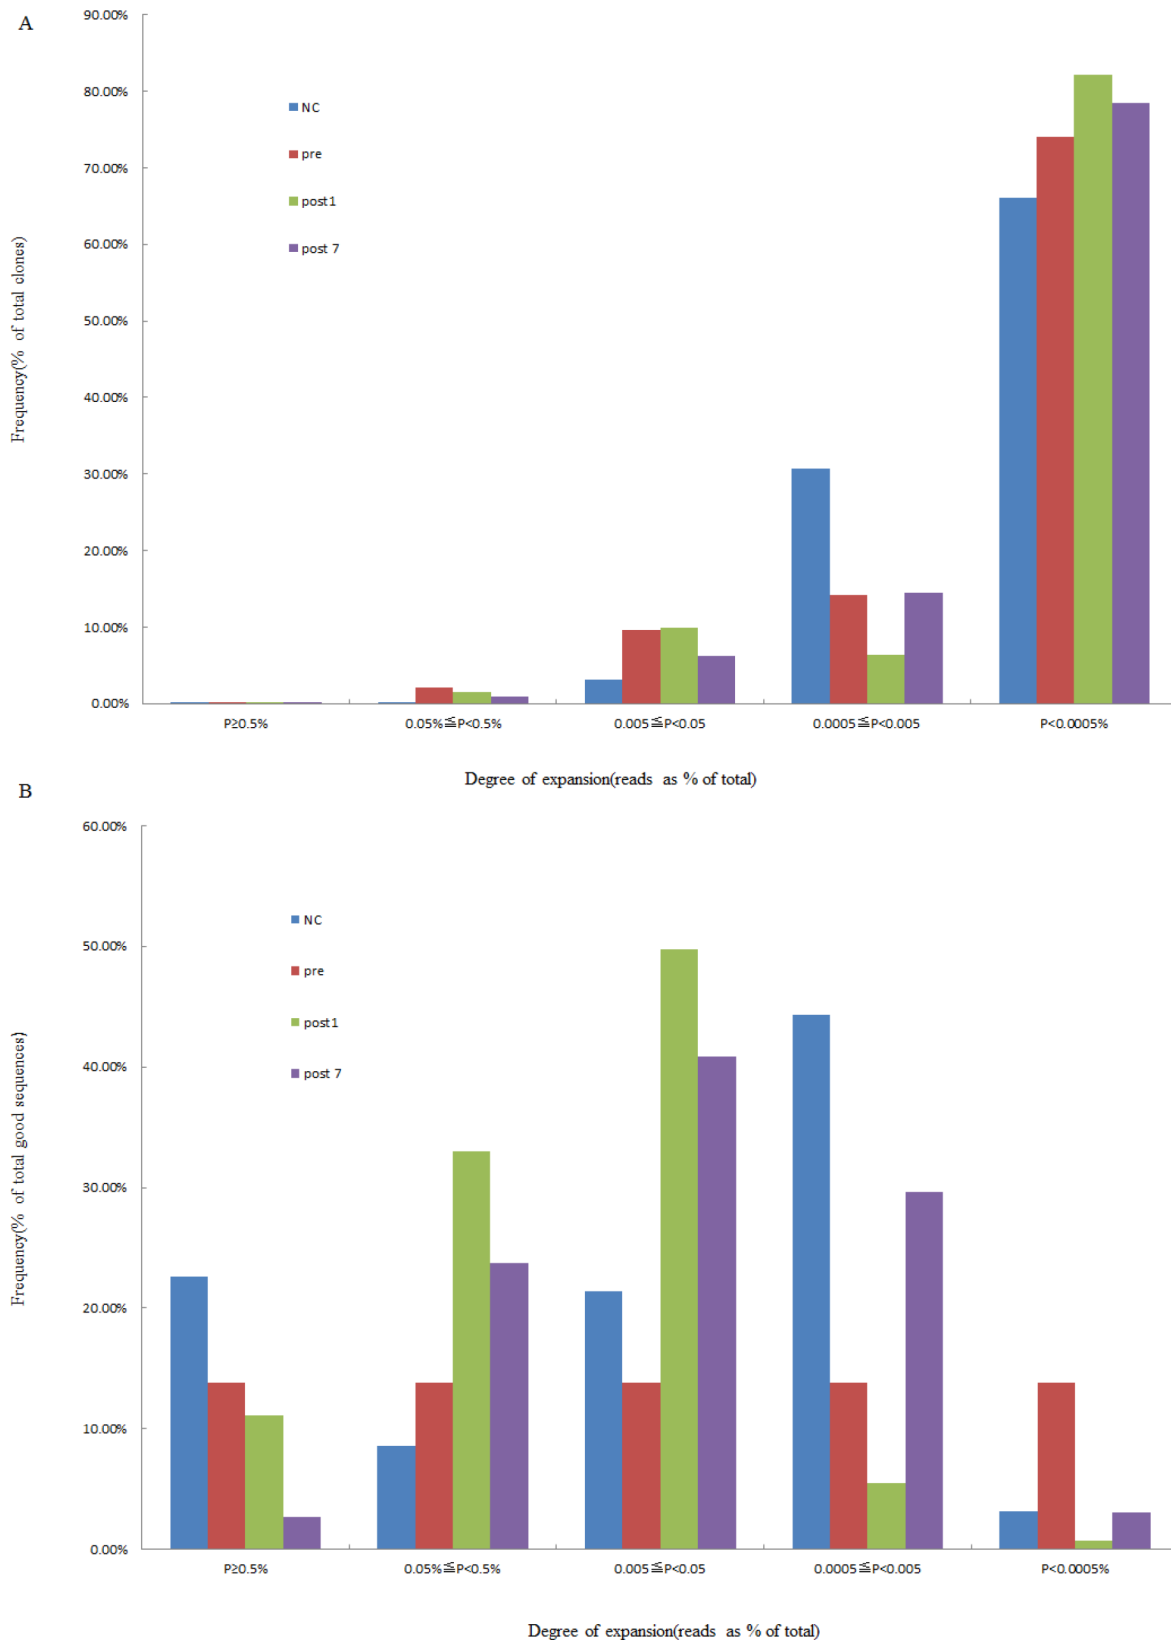

**Figure 2: Degree of expansion and frequency distribution of T cell clones.** (A) The frequency distribution showed that the majority of the clones were low frequency. (B) The percentage of frequency distribution showed that the majority of the repertoire was comprised of a small number of HECs. The x-axis depicts the degree of expansion; the y-axis depicts the percentage of each clone frequency in total clones (or total good sequence).

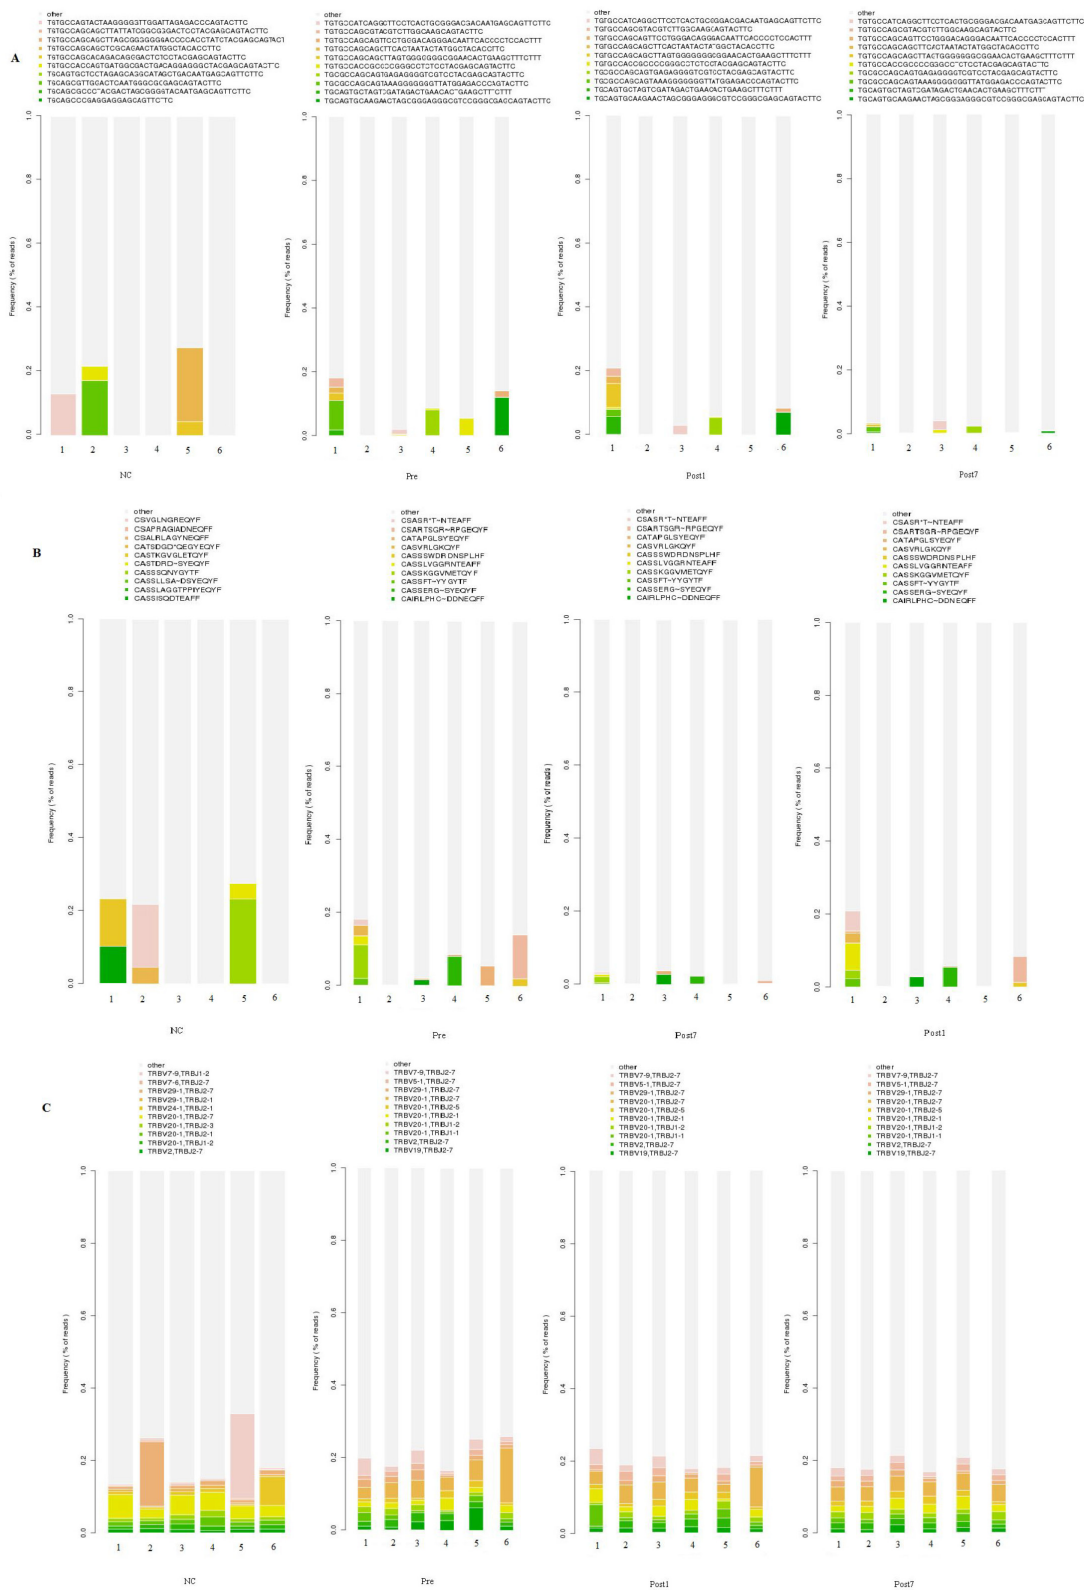

**Figure 3: Quantification of T cell repertoire across the Pre, Post1, Post7 group and NC group.** The ten most common unique TCR  $\beta$ CDR3 sequences (A), CDR3 amino acids (B), and V-J combinations (C) in the different groups (6 individuals in each group) are indicated in colors, and the remaining clonotypes are grouped together in gray.



repertoire after liver transplantation increases the risks for infection and malignancy [16]. Here, we used next-generation sequencing to investigate the characteristics and polymorphisms of the T-cell receptor complementary-determining region 3 (TCR CDR3) gene using T cells from 6 patients at various time points: preoperative patient group (Pre), 1-day postoperative patient group (Post1) and 7-day postoperative patient group (Post7). We assessed the distribution of CDR3 lengths, VD indel and DJ indel lengths among the 238310735 total good sequences. We observed that the CDR3 length distribution, VD indel and DJ indel lengths were similar among Pre, Post1, Post7 and NC groups. Some researchers have found substantial differences in the distributions of CDR3 lengths between the native and memory T cell pools. It is known that different rearrangements may lead to variable CDR3 lengths, and the characteristics of TCR clonality in different subfamilies can be determined by measuring lengths of CDR3 subfamilies. There are some studies reporting that CDR3 is expressed by CD4 single-positive cells in the thymus [17]. However, the details about the differences and functions of the longer and shorter CDR3 groups need to be intensively studied.

In this study, we used a high-throughput immune sequencing technique to study the diversity of the T-cell repertoire in liver transplantation patients. An interesting observation was that most T cell clones were at very low frequencies (<0.5% of total TCR sequences), which implied that these T cell clones had not undergone clonal expansion. In contrast, a few HECs were present in every individual, which may have resulted from physiological

responses to environmental antigens or pathogens. The HECs were greater in the Pre-group than the other groups, while the least was in Post7. A possible explanation for this observation is that newly transplanted livers and the use of the immunosuppressive agents mainly affect the activation and cloning of T lymphocytes of the receptors, which ultimately affects the number of T lymphocytes and the function of the T and B lymphocytes. There are studies indicating that intracellular adenosine triphosphate (iATP) has some value in the immune status, predicting rejection or excessive immune risk [18–19]. These T cells may be gradually cleared by apoptosis 7 days after transplantation. The reduction of donor-reactive clones in tolerant subjects is consistent with our hypothesis that donor-reactive T cells are slowly deleted in response to repeated encounters with donor antigens on quiescent, accepted allografts [20], which results in immune tolerance. The diversity of the immune repertoire is vitally important for health. The greater number of subtypes of immune proteins increases the power of the immune system, and vice versa. We found that the T cell repertoire of the Pre-group and Post1 group was relatively restricted, which may be related to pathology. The Post7 group exhibited the lowest TCR diversity, which is primarily due to the administration of immunosuppressive agents. Therefore, the complexity of this patient's T cell repertoire did not improve between day 1 and 7 days after transplant. Strategies that improve T cell reconstitution and the recovery of high TCR diversity could greatly reduce transplant-associated morbidity and mortality [21].

There were shared TCR DNA sequences and amino acid sequences between different individuals

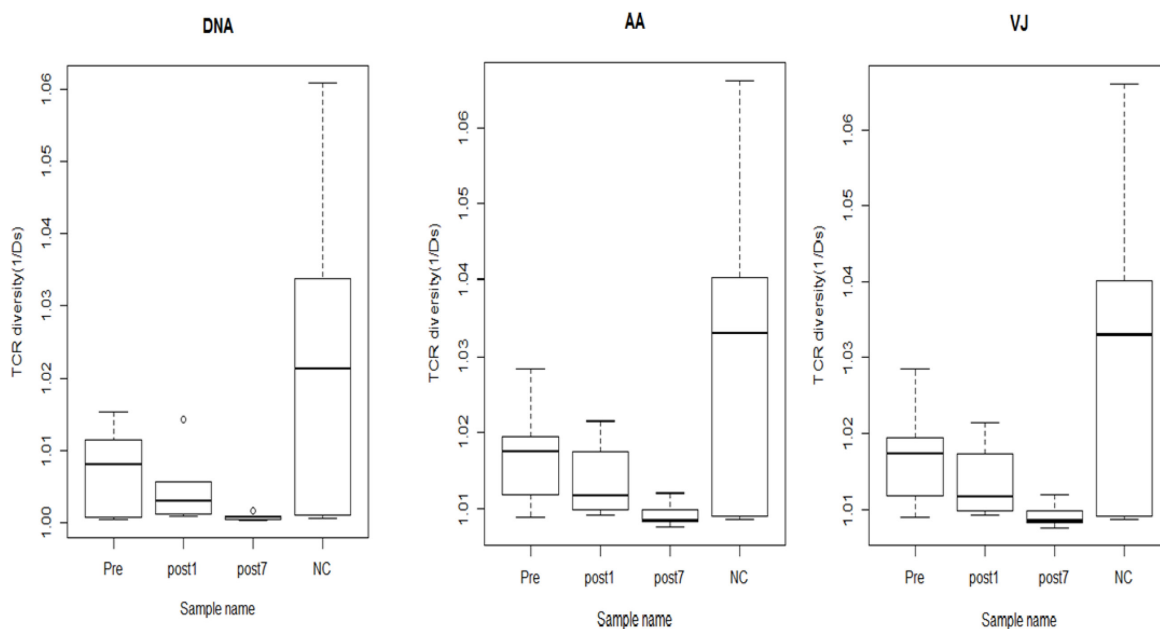

**Figure 4: The TCR diversity of the Pre group ( $n = 6$ ), Post1 group ( $n = 6$ ), Post7 group ( $n = 6$ ) and NC group ( $n = 6$ ) (average of six individuals). Error bars, 95% confidence intervals (CI). The TCR diversity of each group was calculated at different resolutions of distinct DNA sequence, amino acid sequence and V-J combination.**

in each group, and the same TCR sequences existed in more than one individual, also responding to the same antigenic epitope, which was generally considered as an unusual phenomenon [22]. We found 2 amino acid sequences shared by patients in different groups. For

example, the amino acid sequence CASSLGGSYEQYF was observed in all Pre, Post1 and Post7 group patients but not in the NC group, and another amino acid sequence, CASSLGETQYF, was observed in Post1, Post7 and NC groups but not in the Pre-group, which may provide

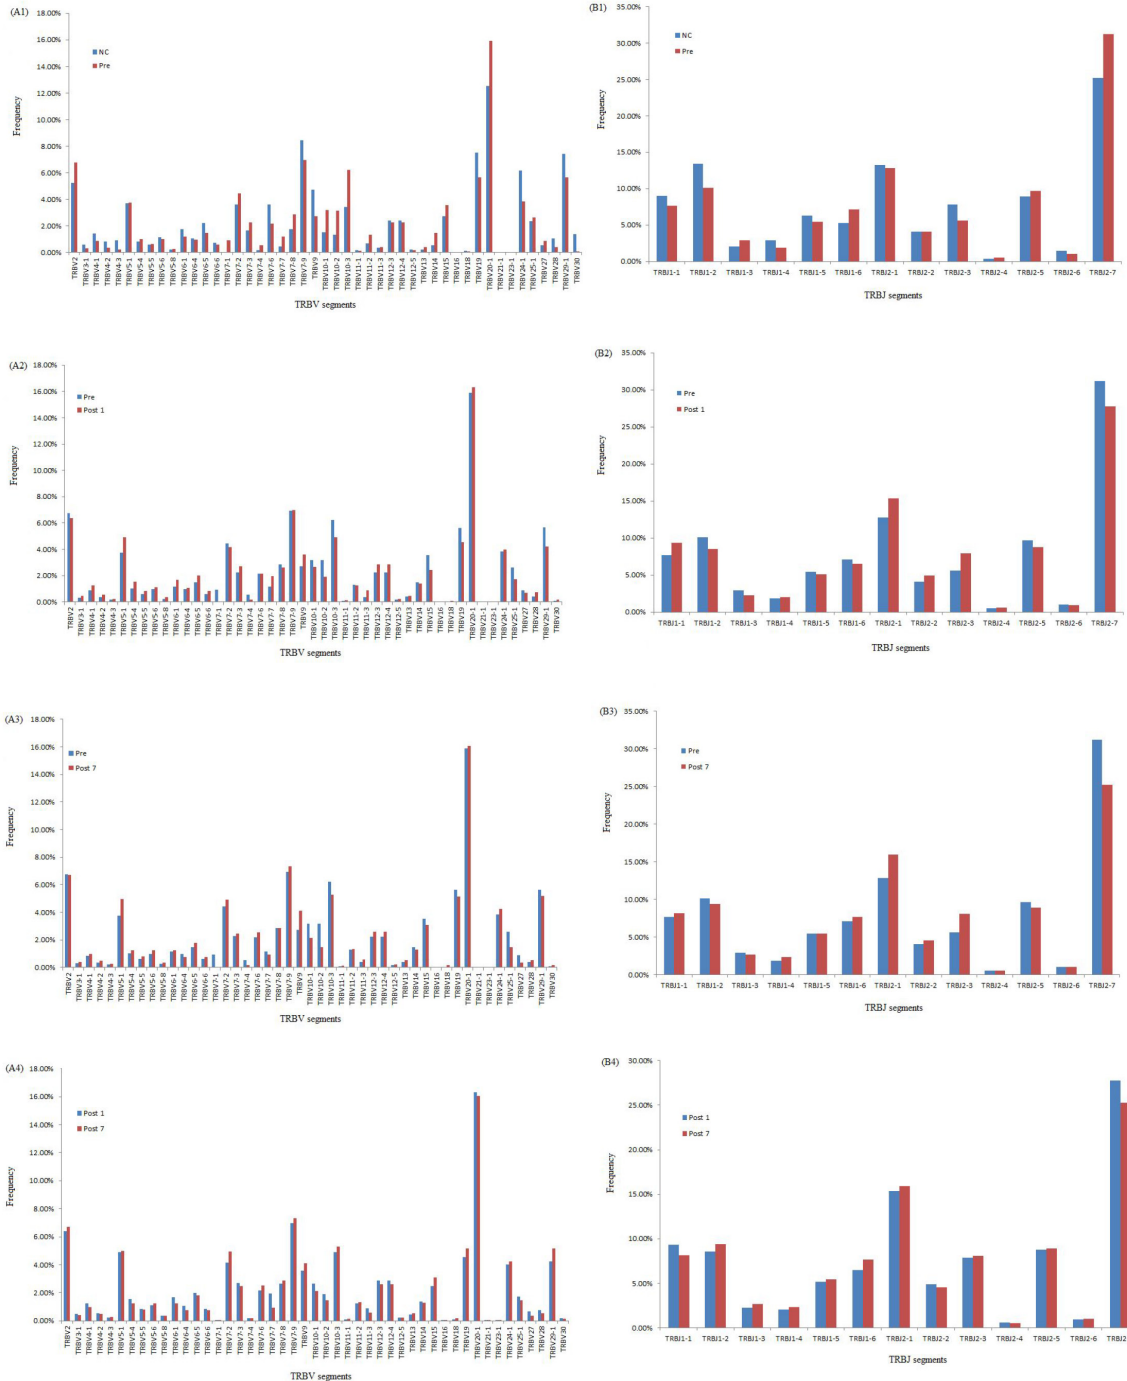

**Figure 5: Comparison of TRBV gene and TRBJ gene usage in Pre, Post1, Post7 and NC groups.** (A1) Comparison of TRBV gene usage between NC and Pre groups. (A2) Comparison of TRBV gene usage between Pre and Post1 groups. (A3) Comparison of TRBV gene usage between Pre and Post7 groups. (A4) Comparison of TRBV gene usage between Post1 and Post7 groups. (B1) Comparison of TRBJ gene usage between NC and Pre groups. (B2) Comparison of TRBJ gene usage Pre and Post1 groups. (B3) Comparison of TRBJ gene usage between Pre and Post7 groups. (B4) Comparison of TRBJ gene usage between Post1 and Post7 groups.

biomarkers for transplantation antigens. Thus, a TCR amino acid sequence with suitable antigen-binding characteristics may be encoded in different cells by different nucleotide sequences and selected independently.

Moreover, we further study the characteristics of the repertoire, also systematically analyzed the V, D and J segment usage frequencies in PBMCs at different time points after liver transplantation. For the 47 TRBV genes, TRBV2, TRBV10-3, TRBV20-1 and TRBV30 showed significant different in the comparison of Pre, Post1, Post7 and NC group. TRBJ2-7 gene was highly expressed in Pre group than other groups in the study of 13 TRBJ genes,

which suggests that at different times following liver transplantation may result in the expansion or deletion of some T cell populations. We know that under normal circumstances, the immune system is unaffected by any antigen stimulation, the different usage of TRBV and TRBJ genes are rearranged randomly, and T cells show a positive polyclonal state. But in certain disease situation, stimulation by specific antigens can cause the targeted rearrangement and excessive abnormal cloning of one or a few TCR BV subfamilies, then the dominant form of the cloned T cell may suppress the cloning of other T cells, which may result in decreased immune function [23–24].

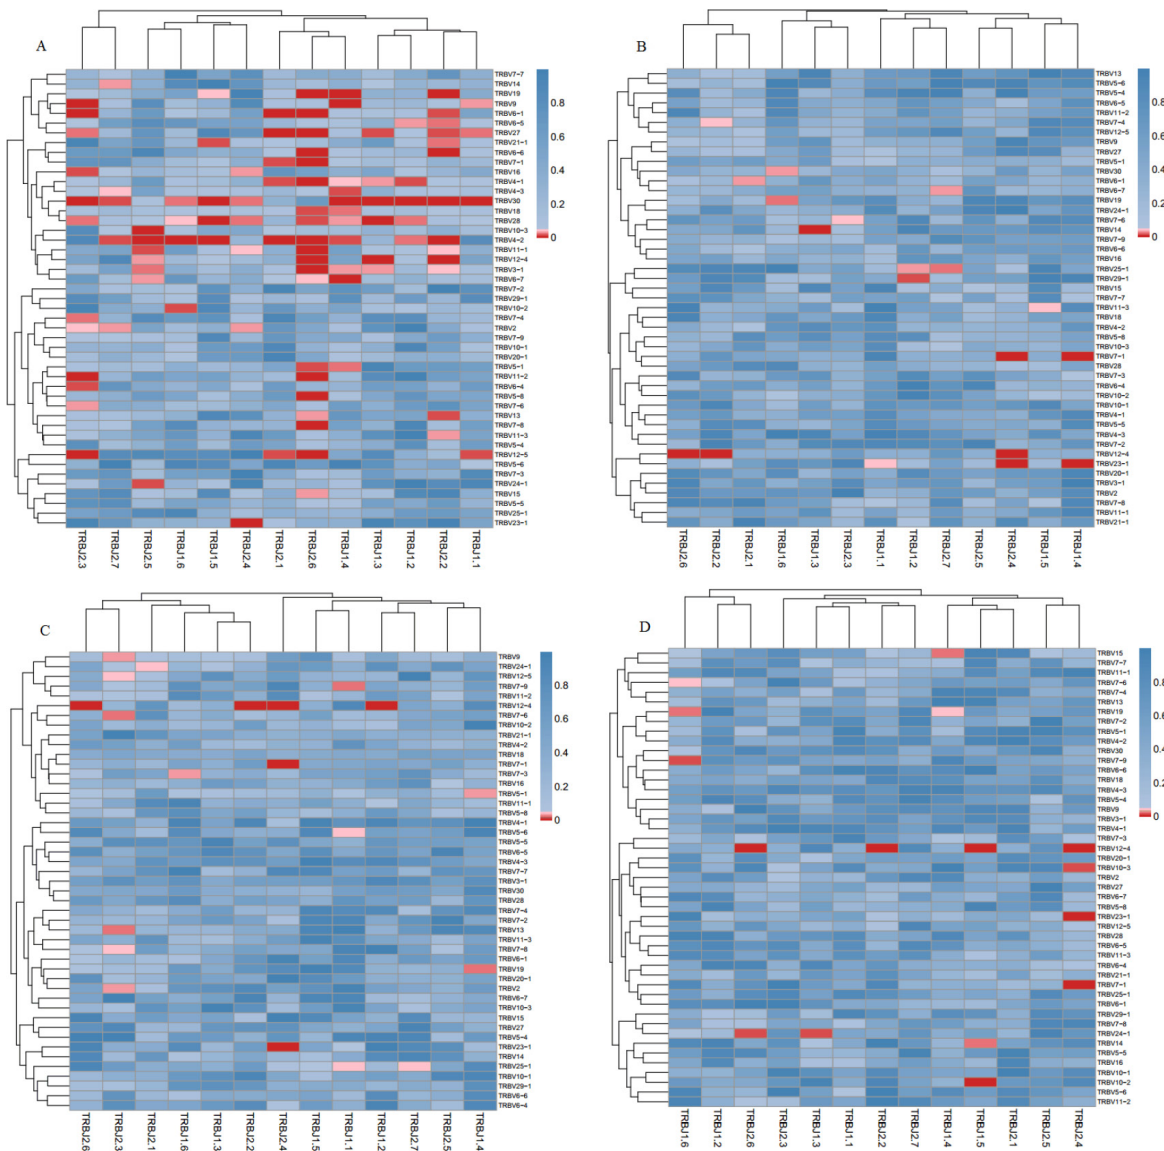

**Figure 6: Comparison of the average V-J gene utilization of the sequenced TCR sequences among Pre, Post1, Post7 and NC groups.** J gene segments are arranged on the x-axis, and V gene segments are arranged on the y-axis. Significant differences were statistically analyzed by the *F*-test. (A) Comparison of V-J combinations between Pre and NC groups; (B) Comparison of V-J combinations between Pre and Post1 groups; (C) Comparison of V-J combinations between Pre and Post7 groups; (D) Comparison of V-J combinations between Post1 and Post7 groups. Different colors (blue to red rectangular bands) indicate different levels of significance. (For interpretation of the references to color in this figure legend, the reader is referred to the web version of this article).

In conclusion, with the usage of high throughput immune repertoire sequencing technique we succeeded in studying the the entire diversity of the immune repertoire at sequence-level resolution. It could accurately monitor immunosuppressive therapies and responses to infections of transplant patients. But regarding the small sample amount, further investigation should concentrate on the study of immunological sequelae observed in disease states, such as after liver transplantation, potential therapeutic targets and disease biomarker.

## MATERIALS AND METHODS

### Patients and healthy controls

Whole blood samples were collected from 6 patients with end-stage hepatitis B cirrhosis (2 females and 4 males with a mean age of  $48.7 \pm 6.3$  years) and 6 healthy donors (NC, 3 females and 3 males with a mean age of  $44.2 \pm 5.9$  years) between 2013 and 2014, and peripheral blood mononuclear cells (PBMCs) were separated. Patients were from the Nephrology Department (organ transplantation and dialysis centre of PLA) at the 181st Hospital, Guangxi, China. All patients underwent liver transplantation surgery, and the patients with end-stage hepatitis B cirrhosis were confirmed by pathologic diagnosis and clinical evidence. The 6 NC were from the Physical Center of the 181st Hospital of Guilin. Whole blood samples were collected from individual healthy donors ( $n = 6$ ) and patients ( $n = 6$ ) at different time points, including before liver transplantation and post-transplant at two time points (post1 and post7), into an ethylenediaminetetraacetic acid (EDTA) VACUTAINERTM blood collection tube (BD, Franklin Lakes, NJ, USA). The clinical diagnosis and pathological features of each patient and the clinical data were reviewed. All the peripheral whole blood samples were collected after the written informed consent was obtained from all subjects or their guardians. The protocol for this research project was approved by the local Ethics Committee.

### T cell isolation, DNA extraction and storage

Peripheral whole blood samples were drawn from elbow vein blood on an empty stomach in the morning from patients and normal controls. PBMCs were prepared from whole blood using lymphocyte separation medium by density gradient centrifugation, and then T cells were isolated from PBMCs by magnetic beads [25]. DNA was extracted from  $0.5 \sim 2 \times 10^6$  T cells from each sample, using GenFIND DNA (Agencourt, Beckman Coulter, Brea, CA, USA) extraction kits, according to the manufacturer's instruction. The DNA was transferred to frozen storage tubes and stored at  $-80^\circ\text{C}$  until used.

T-cell receptor  $\beta$ -chain complementarity determining region 3 (TCR $\beta$  CDR3) was defined according to International Immunogenetics collaboration [26], which began with the second conserved cysteine encoded by the 39th AA of the V gene segment and concluded with the conserved phenylalanine encoded by the 59th aa of the J gene segment. We applied Multiplex-PCR to amplify rearranged TCR CDR3 regions from genomic DNA using a set of primers that we specially developed, which contained the forward and reverse primers, respectively, specific to CDR3 V $\beta$  region and J $\beta$  region. The forward and reverse primers and their sequences, at their 5' ends, were compatible with a GA2 cluster station solid-phase PCR [27]. After the samples were amplified and separated by agarose gel electrophoresis, the products were purified using the QIAquick PCR Purification Kit. The final library was quantitated by two ways: applying the Agilent 2100 bioanalyser instrument (Agilent DNA 1000 Reagents) and real-time quantitative PCR (qPCR) (TaqMan Probe) to determine the average molecule length. The libraries were amplified by the cBot to generate clusters on the flow cell, and an amplified flow cell was pair-end (PE) sequenced using a HiSeq2000 instrument (Illumina, California), using a typical read length of 100 bp.

### High-throughput sequencing and data analysis

The PCR products were sequenced by an Illumina Genome Analyzer, and the quality of raw data that we gained from HiSeq sequencing ranged from 0 to 40. The quality was used to filter out low-quality reads. When we received the data from the sequencer, we first filtered the raw data, including removing adapter contamination. Reads with average quality scores less than 15 (Illumina 0–41 quality system) were removed, the proportion of N bases were lower than 5%, while some bases of the quality lower than 10 were trimmed to ensure the quality score over 15 and that the remaining sequence length was not less than 60 nt. Second, after the filtering, PE read pairs were merged into one contig sequence by two steps: one, aligning the tail parts of two sequences and assessing the identity (software COPE v1.1.3 developed by BGI); the merging required at least 10 bases overlap and had 90% bases matching in the overlapped section; two, as different primers might isolate different length sequences, some of them might be very short, such as less than 100 bp, and will go through all bases on the sequence, which were merged by aligning the head part of the sequences (the software FqMerger developed by BGI). At last, the merged contig sequences and the length distribution plot of the contigs were obtained.

Second, the alignment of TCR data used miTCR software, which was developed by MiLaboratory: <http://mitcr.milaboratory.com/downloads/> and the program is automated to adjust the mechanism for errors introduced by sequencing and PC, and can provide alignment statistic information such as CDR3 expression and indels. After



alignment, we used the following method for the sequence structural analysis: 1, we counted the numbers of each nucleotide and analysed the proportion at each position; 2, we obtained the indels introduced by V-D-J recombination according to the last position of the V gene on the sequence, the start position of the D gene, the last site of the D gene and the start site of the J gene; 3, the nucleotides were translated into amino acids. In addition, the CDR3 region of each sequence was determined after alignment.

Finally, the expression level of each clone was clear and calculated according to the identity of each sequence after alignment and gained the expression of each distinct DNA sequence, amino acid sequence and V-J combination. Meanwhile, to measure the diversity of each sample, we calculated the distinct clone number, Simpson coefficient and Shannon-Wiener coefficient based on different resolution of distinct DNA sequences, amino acids and V-J combinations. The expression level of each sample was also calculated on different resolutions of distinct DNA sequences, amino acids and V-J combinations. In addition, according to the V-J combination profile, the heat-map was plotted. We calculated the TCR repertoire diversity based on the Shannon–Wiener index ( $H'$ ) [28, 29] and the Simpson index of diversity ( $D_s$ ) [30].

## Statistical analysis

The biochemical data were expressed as the mean  $\pm$  standard deviation. The analysis of differences in TCR repertoire among the different groups (including Pre, Post1, Post7 and NC) was performed with a *t*-test. All the statistical analyses were conducted with SPSS 19.0 statistical software and R software and a *p* value < 0.05 was considered significant.

## Abbreviations

CDR: complementarity-determining region; D: Diversity;  $D_s$ : Simpson index of diversity; HBV: Hepatitis B virus;  $H'$ : Shannon–Wiener index; HECs: highly expanded clone; IR: Immune repertoire; J: Joining; MHC: major histocompatibility complex; NC: healthy controls; PBMCs: peripheral blood mononuclear cells; Pre: 1 days before transplantation; Post1: first after transplantation; Post7: on the seventh days after transplantation; TCR: T cell receptor; V: variable.

## ACKNOWLEDGMENTS

We are grateful to all our patients and healthy volunteers for their sincere participation in this study.

## CONFLICTS OF INTEREST

The authors have declared that there are no conflicts of interest in connection with this study.

## FUNDING

This work was supported by funds received from the science and technology program of Shenzhen, Guangdong (NO.JCYJ20170307153704628).

## REFERENCES

1. Coppola N, De Pascalis S, Onorato L, Calò F, Sagnelli C, Sagnelli E. Hepatitis B virus and hepatitis C virus infection in healthcare workers. *World J Hepatol.* 2016; 8:273–81.
2. Parkin DM. The global health burden of infection-associated cancers in the year 2002. *Int J Cancer.* 2006; 118:3030–44.
3. de Jongh FE, Janssen HL, de Man RA, Hop WC, Schalm SW, van Blankenstein M. Survival and prognostic indicators in hepatitis B surface antigen-positive cirrhosis of the liver. *Gastroenterology.* 1992; 103:1630–35.
4. Mast EE, Alter MJ, Margolis HS. Strategies to prevent and control hepatitis B and C virus infections: a global perspective. *Vaccine.* 1999; 17:1730–33.
5. Samuel D, Muller R, Alexander G, Fassati L, Ducot B, Benhamou JP, Bismuth H. Liver transplantation in European patients with the hepatitis B surface antigen. *N Engl J Med.* 1993; 329:1842–47.
6. Klarenbeek PL, Doorenspleet ME, van Schaik BD, Herenius MM, Jakobs ME, Cantaert T, Baeten DL, van Kampen AH, Baas F, de Vries N. Complete T and B cell receptor repertoire analysis in rheumatoid arthritis using high throughput sequencing. *Ann Rheum Dis.* 2010; 69:A33–34.
7. Small TN, Papadopoulos EB, Boulad F, Black P, Castro-Malaspina H, Childs BH, Collins N, Gillio A, George D, Jakubowski A, Heller G, Fazzari M, Kernan N, et al. Comparison of immune reconstitution after unrelated and related T-cell-depleted bone marrow transplantation: effect of patient age and donor leukocyte infusions. *Blood.* 1999; 93:467–80.
8. Maury S, Mary JY, Rabian C, Schwarzinger M, Toubert A, Scieux C, Carmagnat M, Esperou H, Ribaud P, Devergie A, Guardiola P, Vexiau P, Charron D, et al. Prolonged immune deficiency following allogeneic stem cell transplantation: risk factors and complications in adult patients. *Br J Haematol.* 2001; 115:630–41.
9. Aouinti S, Malouche D, Giudicelli V, Kossida S, Lefranc MP. IMGT/HighV - QUEST statistical significance of IMGT clonotype (AA) diversity per gene for standardized comparisons of next generation sequencing immunoprofiles of immunoglobulins and T cell receptors. *PLoS One.* 2015; 10:e0142353.
10. González-Serna A, Abad-Fernández M, Soriano-Sarabia N, Leal M, Vallejo A. CD8 TCR  $\beta$  chain repertoire expansions and deletions are related with immunologic markers in HIV-1-infected patients during treatment interruption. *J Clin Virol.* 2013; 58:703–09.



11. Davis MM, Bjorkman PJ. T-cell antigen receptor genes and T-cell recognition. *Nature*. 1988; 334:395–402.
12. Yuan Z, Xiaoqiong G, Haiying L. Overview of T cell receptor immune repertoire research technology. *Chin J Microbiol Immunol*. 2012; 32:751–54.
13. Metzker ML. Sequencing technologies - the next generation. *Nat Rev Genet*. 2010; 11:31–46.
14. Bolotin DA, Shugay M, Mamedov IZ, Putintseva EV, Turchaninova MA, Zvyagin IV, Britanova OV, Chudakov DM. MiTCR: software for T-cell receptor sequencing data analysis. *Nat Methods*. 2013; 10:813–14.
15. Keeffe EB. Liver transplantation: current status and novel approaches to liver replacement. *Gastroenterology*. 2001; 120:749–62.
16. van Heijst JW, Ceberio I, Lipuma LB, Samilo DW, Wasilewski GD, Gonzales AM, Nieves JL, van den Brink MR, Perales MA, Pamer EG. Quantitative assessment of T cell repertoire recovery after hematopoietic stem cell transplantation. *Nat Med*. 2013; 19:372–77.
17. Yassai M, Ammon K, Goverman J, Marrack P, Naumov Y, Gorski J. A molecular marker for thymocyte-positive selection: selection of CD4 single-positive thymocytes with shorter TCRB CDR3 during T cell development. *J Immunol*. 2002; 168:3801–07.
18. Kowalski RJ, Post DR, Mannon RB, Sebastian A, Wright HI, Sigle G, Burdick J, Elmagd KA, Zeevi A, Lopez-Cepero M, Daller JA, Gritsch HA, Reed EF, et al. Assessing relative risks of infection and rejection: a meta-analysis using an immune function assay. *Transplantation*. 2006; 82:663–68.
19. Rodrigo E, López-Hoyos M, Corral M, Fábrega E, Fernández-Fresnedo G, San Segundo D, Piñera C, Arias M. ImmuKnow as a diagnostic tool for predicting infection and acute rejection in adult liver transplant recipients: a systematic review and meta-analysis. *Liver Transpl*. 2012; 18:1245–53.
20. Andreola G, Chittenden M, Shaffer J, Cosimi AB, Kawai T, Cotter P, Locascio SA, Morokata T, Dey BR, Tolkoff-Rubin NT, Preffer F, Bonnefoix T, Kattleman K, et al. Mechanisms of donor-specific tolerance in recipients of haploidentical combined bone marrow/kidney transplantation. *Am J Transplant*. 2011; 11:1236–47.
21. Goldberg GL, Zakrzewski JL, Perales MA, van den Brink MR. Clinical strategies to enhance T cell reconstitution. *Semin Immunol*. 2007; 19:289–96.
22. Cibotti R, Cabaniols JP, Pannetier C, Delarbre C, Vergnon I, Kanellopoulos JM, Kourilsky P. Public and private V beta T cell receptor repertoires against hen egg white lysozyme (HEL) in nontransgenic versus HEL transgenic mice. *J Exp Med*. 1994; 180:861–72.
23. Matsumoto Y, Matsuo H, Sakuma H, Park IK, Tsukada Y, Kohyama K, Kondo T, Kotorii S, Shibuya N. CDR3 spectratyping analysis of the TCR repertoire in myasthenia gravis. *J Immunol*. 2006; 176:5100–07.
24. Miqueu P, Guillet M, Degauque N, Doré JC, Souillou JP, Brouard S. Statistical analysis of CDR3 length distributions for the assessment of T and B cell repertoire biases. *Mol Immunol*. 2007; 44:1057–64.
25. Dziubianau M, Hecht J, Kuchenbecker L, Sattler A, Stervbo U, Rödelserger C, Nickel P, Neumann AU, Robinson PN, Mundlos S, Volk HD, Thiel A, Reinke P, Babel N. TCR repertoire analysis by next generation sequencing allows complex differential diagnosis of T cell-related pathology. *Am J Transplant*. 2013; 13:2842–54.
26. Yousfi Monod M, Giudicelli V, Chaume D, Lefranc MP. IMGT/JunctionAnalysis: the first tool for the analysis of the immunoglobulin and T cell receptor complex V-J and V-D-J JUNCTIONS. *Bioinformatics*. 2004; 20:i379–85.
27. Robins HS, Campregher PV, Srivastava SK, Wacher A, Turtle CJ, Kahsai O, Riddell SR, Warren EH, Carlson CS. Comprehensive assessment of T-cell receptor  $\beta$ -chain diversity in alphabeta T cells. *Blood*. 2009; 114:4099–107.
28. Keylock CJ. Simpson diversity and the Shannon–Wiener index as special cases of a generalized entropy. *Oikos*. 2005; 109:203–07.
29. Stewart JJ, Lee CY, Ibrahim S, Watts P, Shlomchik M, Weigert M, Litwin S. A Shannon entropy analysis of immunoglobulin and T cell receptor. *Mol Immunol*. 1997; 34:1067–82.
30. Venturi V, Kedzierska K, Turner SJ, Doherty PC, Davenport MP. Methods for comparing the diversity of samples of the T cell receptor repertoire. *J Immunol Methods*. 2007; 321:182–95.
